# Supplementary material for: Structural MRI and Amyloid PET Imaging for Prediction of Conversion to Alzheimer's Disease in Patients with Mild Cognitive Impairment: A Meta-Analysis
Source: PubMed Central journal article supplement — Psychiatry Investig. 2017 Mar 6;14(2):205–15. doi: 10.4306/pi.2017.14.2.205 (PMC5355020; doi:10.4306/pi.2017.14.2.205), 2017-03-06
Supplement: pi-14-205-s001.pdf [file pi-14-205-s001.pdf]

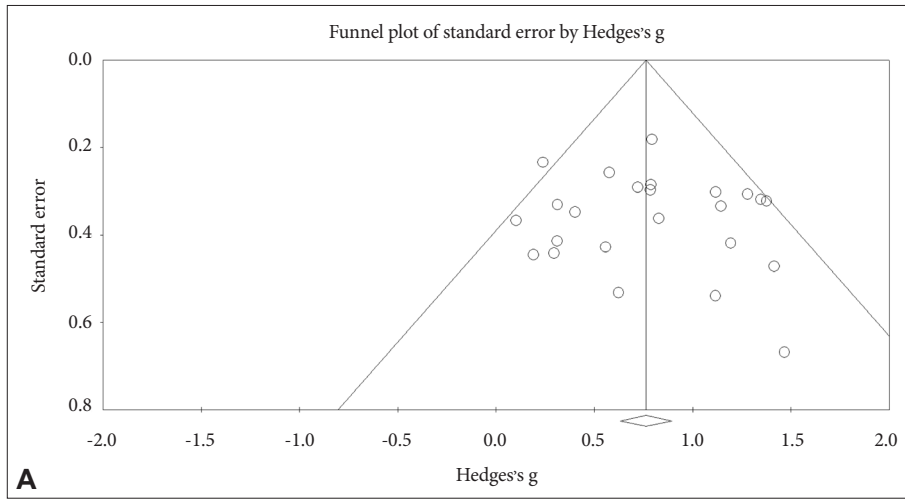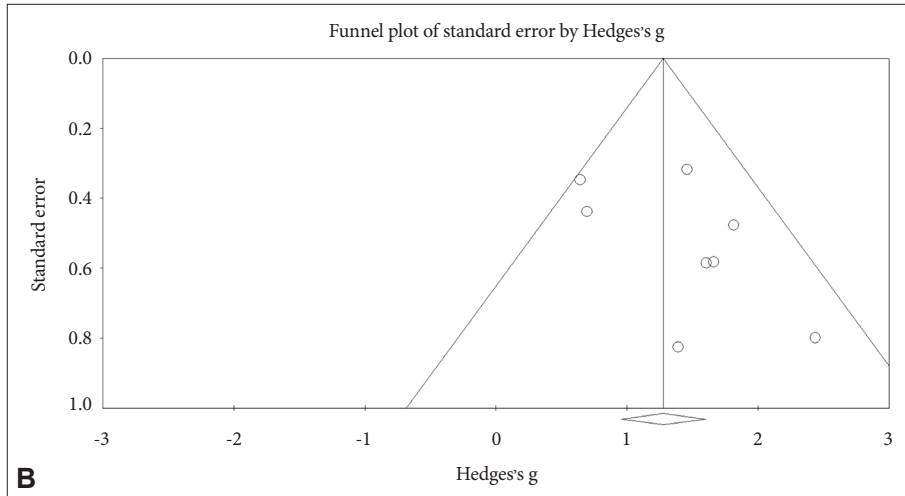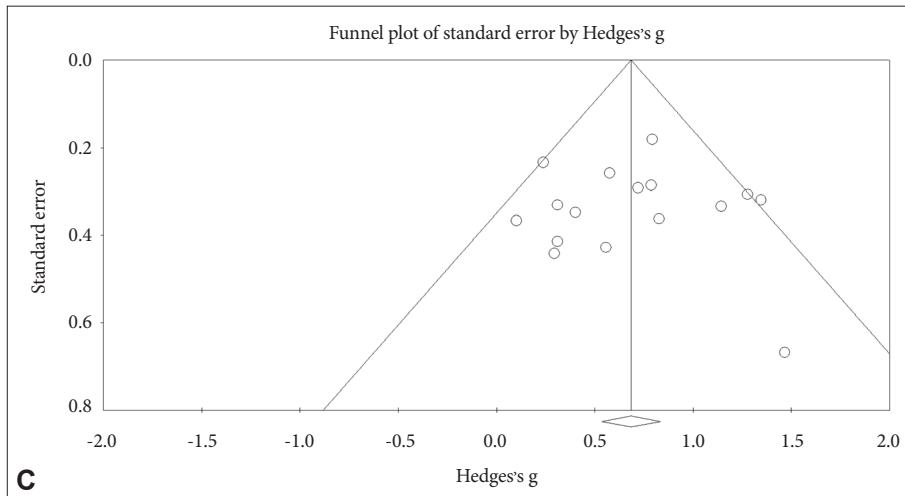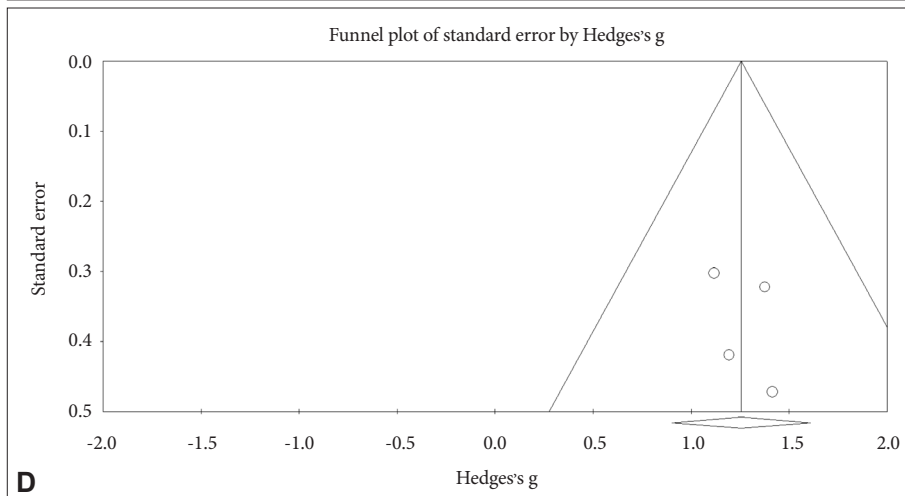

**Supplementary Figure 1.** Funnel plot of comparison between progressive MCI versus stable MCI participants (A) Any VOI MRI measurement (B) Amyloid PET (C) Hippocampus volume measurement (D) entorhinal cortex volume measurement.
